# Supplementary material
Source: HighWire-hosted journal article supplement (http://www.qdcxjkg.com/highwire/filestream/113869/field_highwire_adjunct_files/0/ERJ-00566-2012_Disclosures.pdf)
Supplement: ERJ-00566-2012_Disclosures.pdf [file ERJ-00566-2012_Disclosures.pdf]

**C.P. Heussel** owns stock in Stada and GSK; has received consultation or other fees from Schering-Plough in 2009 and 2010, Pfizer in 2008 and 2009–2011, Basilea in 2008–2010, Boehringer Ingelheim in 2010–2012, Roche in 2010, Astellas in 2011–2012, Gilead in 2011–2012, MSD in 2011–2012, and Lilly in 2011; has received lecture fees from Gilead in 2008–2011, Essex in 2008–2010, Schering-Plough in 2008–2010, AstraZeneca in 2008–2010 and 2012, Lilly in 2008–2009 and 2012, Roche in 2008–2009, MSD in 2009–2012, Pfizer in 2010–2012, Bracco in 2010–2011, MEDA Pharma in 2011, Intermune in 2011–2012, and Chiesi in 2012; and has received research funding from Novartis in 2012.
